# Supplementary material for: Are Mechanical and Biological Techniques Efficient in Restoring Soil and Associated Biodiversity in a Brownfield Site?
Source: MDPI journal article supplement (doi:10.3390/land11122133), 2022-11-26
Supplement: s1 [file s1]

**Supplementary data:** Table S1 of the correlation measured with the Spearman method between all the variable measures in the 3 compartments (soil structure, aboveground vegetation and soil fauna). The cells highlighted in fluorescent yellow correspond to the main observed correlations usually with an  $r^2$  greater than 0.4 (except for carbon/QBS correlation)

|                                | Vegetation cover | Dry biomass graminoids | Dry biomass leguminous | Dry biomass other | Total dry biomass | Vegetation species richness | Vegetation species diversity | Vegetation equitability | QBS         | Soil fauna classes richness | Soil fauna diversity | Soil fauna equitability | Epiedaphic collembola density | Hemiedaphic collembola density | Euedaphic collembola density | Total collembola density | Total soil fauna density | Surface Compaction | Bulk density | %nitrogen   | %Carbon     |
|--------------------------------|------------------|------------------------|------------------------|-------------------|-------------------|-----------------------------|------------------------------|-------------------------|-------------|-----------------------------|----------------------|-------------------------|-------------------------------|--------------------------------|------------------------------|--------------------------|--------------------------|--------------------|--------------|-------------|-------------|
| Vegetation cover               | 1                | 0,21736865             | 0,43232627             | 0,19098989        | 0,54238051        | -0,05737655                 | -0,40699303                  | -0,52659914             | 0,25391904  | 0,16446453                  | -0,01079777          | -0,12002141             | 0,04847309                    | -0,01412288                    | 0,1212286                    | 0,00623548               | 0,08724635               | -0,2224354         | 0,14496724   | 0,27799533  | 0,12915799  |
| Dry biomass graminoids         |                  | 1                      | 0,06543497             | -0,1322793        | 0,35026954        | 0,07713776                  | 0,13163976                   | 0,1162433               | 0,2376546   | 0,41150333                  | 0,31793697           | 0,23017713              | 0,15587479                    | -0,20211745                    | -0,14929537                  | -0,20997881              | 0,2475934                | -0,31222334        | 0,36265646   | 0,00254264  | -0,04618939 |
| Dry biomass leguminous         |                  |                        | 1                      | 0,23314109        | 0,91692308        | -0,09926764                 | -0,32153846                  | -0,35846154             | -0,11950687 | 0,16637611                  | 0,04923077           | 0,02153846              | -0,29394334                   | -0,07386036                    | 0,17932576                   | -0,10510111              | -0,258561                | -0,06616657        | 0,0650125    | 0,03641649  | -0,05615388 |
| Dry biomass other              |                  |                        |                        | 1                 | 0,29441288        | -0,09750891                 | -0,00077071                  | -0,00616571             | 0,02008498  | -0,08751592                 | -0,18227394          | -0,24238966             | 0,01368906                    | 0,44999104                     | 0,17095909                   | 0,41330781               | 0,22783373               | 0,1379844          | 0,12815591   | 0,25243725  | 0,21580002  |
| Total dry biomass              |                  |                        |                        |                   | 1                 | -0,0848641                  | -0,23769231                  | -0,27692308             | -0,0381651  | 0,24401829                  | 0,08307692           | 0,03230769              | -0,21782256                   | -0,10963647                    | 0,09275471                   | -0,14205974              | -0,09811467              | -0,11886902        | 0,22581266   | 0,04107442  | -0,08307692 |
| Vegetation species richness    |                  |                        |                        |                   |                   | 1                           | 0,42276336                   | 0,1440354               | 0,30668646  | 0,20528277                  | 0,08681052           | -0,07474269             | 0,02390369                    | 0,07008475                     | 0,15901062                   | 0,10501329               | -0,06250427              | -0,00272552        | -0,29163045  | 0,3662289   | 0,55356308  |
| Vegetation species diversity   |                  |                        |                        |                   |                   |                             | 1                            | 0,93230769              | 0,17270671  | 0,19054026                  | 0,31538462           | 0,24692308              | -0,04996646                   | -0,15772264                    | -0,11439747                  | -0,12781527              | -0,03963063              | -0,04154645        | 0,11155992   | 0,10162742  | 0,16538462  |
| Vegetation equitability        |                  |                        |                        |                   |                   |                             |                              | 1                       | 0,04895927  | 0,06060844                  | 0,28                 | 0,28846154              | -0,04137848                   | -0,14348914                    | -0,24232167                  | -0,14667957              | -0,02539438              | -0,06578188        | 0,1988844    | -0,04954337 | -0,04307692 |
| QBS                            |                  |                        |                        |                   |                   |                             |                              |                         | 1           | 0,4842036                   | 0,4148045            | 0,22166597              | 0,11757572                    | 0,06188562                     | 0,33352808                   | 0,05132168               | 0,01523335               | 0,07480256         | -0,08791229  | 0,40087242  | 0,38859005  |
| Soil fauna classes richness    |                  |                        |                        |                   |                   |                             |                              |                         |             | 1                           | 0,63737895           | 0,28680072              | 0,34596689                    | -0,20107647                    | -0,1134448                   | -0,22224668              | 0,02001244               | -0,20741583        | 0,01267871   | -0,05909544 | -0,04555536 |
| Soil fauna diversity           |                  |                        |                        |                   |                   |                             |                              |                         |             |                             | 1                    | 0,89692308              | 0,0105398                     | -0,41046356                    | -0,35903801                  | -0,48123218              | -0,32358602              | -0,20080785        | 0,08232353   | 0,01100964  | 0,01307692  |
| Soil fauna equitability        |                  |                        |                        |                   |                   |                             |                              |                         |             |                             |                      | 1                       | -0,17215008                   | -0,49432584                    | -0,38647794                  | -0,5643891               | -0,41977687              | -0,141181          | 0,13810348   | -0,04530889 | -0,06692308 |
| Epiedaphic collembola density  |                  |                        |                        |                   |                   |                             |                              |                         |             |                             |                      |                         | 1                             | 0,28892419                     | -0,01922042                  | 0,32939289               | 0,5076672                | -0,25261345        | -0,18252981  | -0,37583869 | -0,1561452  |
| Hemiedaphic collembola density |                  |                        |                        |                   |                   |                             |                              |                         |             |                             |                      |                         |                               | 1                              | 0,38732539                   | 0,97227599               | 0,67038677               | 0,00307811         | -0,19776837  | 0,27974094  | 0,28851703  |
| Euedaphic collembola density   |                  |                        |                        |                   |                   |                             |                              |                         |             |                             |                      |                         |                               |                                | 1                            | 0,50754732               | 0,28455723               | 0,36896415         | -0,26304883  | 0,24891645  | 0,30724996  |
| Total collembola density       |                  |                        |                        |                   |                   |                             |                              |                         |             |                             |                      |                         |                               |                                |                              | 1                        | 0,71923756               | 0,05929921         | -0,25606477  | 0,24562418  | 0,27141495  |
| Total soil fauna density       |                  |                        |                        |                   |                   |                             |                              |                         |             |                             |                      |                         |                               |                                |                              |                          | 1                        | -0,18780066        | 0,04464114   | -0,01969789 | -0,05848404 |
| Surface Compaction             |                  |                        |                        |                   |                   |                             |                              |                         |             |                             |                      |                         |                               |                                |                              |                          |                          | 1                  | -0,26548673  | 0,20541159  | 0,20157723  |
| Bulk density                   |                  |                        |                        |                   |                   |                             |                              |                         |             |                             |                      |                         |                               |                                |                              |                          |                          |                    | 1            | -0,17809397 | -0,19696096 |
| %nitrogen                      |                  |                        |                        |                   |                   |                             |                              |                         |             |                             |                      |                         |                               |                                |                              |                          |                          |                    |              | 1           | 0,85748139  |
| %Carbon                        |                  |                        |                        |                   |                   |                             |                              |                         |             |                             |                      |                         |                               |                                |                              |                          |                          |                    |              |             |             |
